# Supplementary material
Source: PubMed Central journal article supplement (PMC7935436)
Supplement: NIHMS1658790-supplement-SI_file.pdf [file NIHMS1658790-supplement-SI_file.pdf]

Supporting Information

**Mixed Metal–Organic Framework with Multiple Binding Sites for Efficient C<sub>2</sub>H<sub>2</sub>/CO<sub>2</sub> Separation**

*Junkuo Gao,\* Xuefeng Qian, Rui-Biao Lin,\* Rajamani Krishna, Hui Wu, Wei Zhou,\* and Banglin Chen\**

anie\_202000323\_sm\_miscellaneous\_information.pdf

## 1 **1. Materials and general methods**

2 All chemicals were purchased from Alfa Aesar, TCI chemical and Aldrich and used without  
3 further purification. Powder X-ray diffraction data were recorded on a Bruker D8 Advance  
4 diffractometer with a graphite-monochromatized Cu K $\alpha$  radiation. The gas sorption isotherms were  
5 collected using an automatic volumetric adsorption apparatus Micromeritics ASAP 2020. The  
6 specific surface areas of sample were measured with a N $_2$  adsorption-desorption isotherms by the  
7 Brunauer-Emmett-Teller (BET) method at 77 K. All the samples were degassed at 100 °C for 3  
8 hours before the gas sorption measurements. Thermogravimetric analysis (TGA) was carried out  
9 under air atmosphere from room temperature to 500 °C using a Shimadzu TGA-50 analyzer at a  
10 heating rate of 10 °C min $^{-1}$ . For variable-temperature powder X-ray diffraction (VT-PXRD), the  
11 measured parameter included a scan speed of 10 ° min $^{-1}$ , a step size of 0.02° and a scan range of  
12 2 $\theta$  from 10° to 40°. The heating rate is 5 °C min $^{-1}$  and the sample was maintained 5 minutes at  
13 each target temperature. The target temperatures are set as follows: 60 °C, 90 °C, 120 °C, 150 °C,  
14 180 °C and 200 °C. The energy-dispersive X-ray spectroscopy (EDS) analyses were carried out by  
15 transmission electron microscopy (TEM, JEM-2100).

## 16 **2. Synthesis of [Fe(pyz)Ni(CN) $_4$ ] (FeM-M'MOF)**

17 Fe(ClO $_4$ ) $_2$ ·xH $_2$ O (1 mmol) and pyrazine (1 mmol) were dissolved in a mixture of 50 ml of  
18 deionized water and 50 ml of methanol under the protection of N $_2$ . **Caution! Iron (II) perchlorate**  
19 **salt is potentially explosive and must be handled with care!** Separately, 1 mmol of K $_2$ [M(CN) $_4$ ]  
20 (M = Ni, Pt) is dissolved in 20 ml of deionized water and the solution is dropwise added to the  
21 Fe(ClO $_4$ ) $_2$ ·xH $_2$ O-pyrazine solution. Precipitation of the clathrates instantaneously occurs under  
22 vigorous stirring. After stirring for 30 minutes, separated by Centrifuge the powder was recovered  
23 and washed with water several times, then dry in vacuum overnight at room temperature.  
24 Elemental analysis of activated **FeNi-M'MOF** (C $_8$ H $_4$ N $_6$ FeNi), Calcd: C, 32.17%; H, 1.35%; N,  
25 28.14% and found: C, 32.45%; H, 1.64%; N, 28.36%.

## 26 **3. Fitting of pure component isotherms**

27 The experimentally measured loadings for C $_2$ H $_2$ , and CO $_2$  at 273 K, and 298 K in **FeM-M'MOF**  
28 were fitted with the dual-Langmuir isotherm model

1 
$$q = q_{A,sat} \frac{b_A P}{1 + b_A P} + q_{B,sat} \frac{b_B P}{1 + b_B P} \quad (1)$$

2 The Langmuir parameters for each site is temperature-dependent

3 
$$b_A = b_{A0} \exp\left(\frac{E_A}{RT}\right); \quad b_b = b_{B0} \exp\left(\frac{E_B}{RT}\right) \quad (2)$$

4 The Dual-site Langmuir fit parameters are provided in Table S3 and S4.

#### 5 **4. Isotheric heat of adsorption**

6 The binding energy of C<sub>2</sub>H<sub>2</sub> is reflected in the isotheric heat of adsorption,  $Q_{st}$ , defined as

7 
$$Q_{st} = RT^2 \left( \frac{\partial \ln p}{\partial T} \right)_q \quad (3)$$

#### 8 **5. IAST calculations of adsorption selectivities**

9 In order to compare the C<sub>2</sub>H<sub>2</sub>/CO<sub>2</sub> separation performance of various MOFs, IAST calculations  
10 of mixture adsorption were performed. For separation of a binary mixture of components A and  
11 B, the adsorption selectivity is defined by

12 
$$S_{ads} = \frac{q_A/q_B}{y_A/y_B} \quad (4)$$

13 where the  $q_A$ , and  $q_B$  represent the molar loadings, expressed in mol kg<sup>-1</sup>, within the MOF that is  
14 in equilibrium with a bulk fluid mixture with mole fractions  $y_A$ , and  $y_B = 1 - y_A$ . The molar loadings,  
15 also called *gravimetric uptake capacities*, are usually expressed with the units mol kg<sup>-1</sup>. The IAST  
16 calculations of 50/50 mixture adsorption taking the mole fractions  $y_A = 0.5$  and  $y_B = 1 - y_A = 0.5$   
17 for a range of pressures up to 100 kPa and 298 K were performed.

#### 18 **6. Transient breakthrough simulations**

19 The performance of industrial fixed bed adsorbers is dictated by a combination of adsorption  
20 selectivity and uptake capacity. For a proper comparison of various MOFs, we perform transient  
21 breakthrough simulations using the simulation methodology described in the literature.<sup>[S1]</sup> or the  
22 breakthrough simulations, the following parameter values were used: length of packed bed,  $L =$   
23 0.3 m; voidage of packed bed,  $\varepsilon = 0.4$ ; superficial gas velocity at inlet,  $u = 0.04$  m/s. The transient

1 breakthrough simulation results are presented in terms of a *dimensionless* time,  $\tau$ , defined as

$$2 \quad \tau = \frac{tu}{\varepsilon L}.$$

3 During the initial transience, the effluent gas contains pure CO<sub>2</sub> and this continues until C<sub>2</sub>H<sub>2</sub>  
4 starts breaking through because its uptake capacity in the MOF has been reached.

5 During a certain time interval,  $\Delta\tau$ , pure CO<sub>2</sub> can be recovered in the gas phase. As in previous  
6 works,<sup>[S1a]</sup> we set the purity of CO<sub>2</sub> to 99.95%. The MOFs are all compared on the basis of the  
7 moles of 99.95% pure CO<sub>2</sub> produced per L of adsorbent material.

8 If  $\tau_{break}$  is the breakthrough time for C<sub>2</sub>H<sub>2</sub>, during the time interval 0 to  $\tau_{break}$ , C<sub>2</sub>H<sub>2</sub> is captured.  
9 The volumetric C<sub>2</sub>H<sub>2</sub> capture capacity, expressed in mol/L, can be determined from a material  
10 balance.

## 11 **7. Neutron diffraction experiment**

12 Neutron powder diffraction (NPD) measurements were conducted using the BT-1 neutron  
13 powder diffractometer at the National Institute of Standards and Technology (NIST) Center for  
14 Neutron Research. A Ge(311) monochromator with a 75° take-off angle,  $\lambda = 2.0787(2)$  Å, and in-  
15 pile collimation of 60 minutes of *arc* was used. Data were collected over the range of 1.3-166.3°  
16 ( $2\theta$ ) with a step size of 0.05°. Fully activated **FeNi-M'MOF** sample was loaded in a vanadium can  
17 equipped with a capillary gas line. A closed-cycle He refrigerator was used to control the sample  
18 temperature. The bare MOF sample was measured first. To investigate the gas adsorption structure,  
19 the sample was charged with gas molecules at pre-determined pressures and temperatures, and  
20 allowed enough time to reach equilibrium. Diffraction data were then collected on the gas-loaded  
21 samples. For comparison purpose, both CO<sub>2</sub> and C<sub>2</sub>D<sub>2</sub> were studied. Note that for acetylene  
22 adsorption, deuterated gas C<sub>2</sub>D<sub>2</sub> was used to avoid the large incoherent neutron scattering  
23 background that would be produced by the hydrogen in C<sub>2</sub>H<sub>2</sub>. Rietveld structural refinement was  
24 performed on the neutron diffraction data using the GSAS package. Due to the large number of  
25 atoms in the crystal unit cell, the ligand molecule and the gas molecule were both treated as rigid  
26 bodies in the Rietveld refinement (to limit the number of variables), with the molecule orientation  
27 and center of mass freely refined. Final refinement on lattice parameters, atomic coordinates,  
28 positions/orientations of the rigid bodies, thermal factors, gas molecule occupancies, background,  
29 and profiles all converge with satisfactory R-factors.

## 1 8. Breakthrough experiments

2 The breakthrough experiments were carried out in dynamic gas breakthrough set-up. A  
3 stainless-steel column with inner dimensions of  $4 \times 150$  mm was used for sample packing. MOF  
4 particles (0.560 g) with size of 220-320  $\mu\text{m}$  obtained through particle size sieving was then packed  
5 into the column. The column was placed in a temperature-controlled environment (maintained at  
6 298 K). The mixed gas flow and pressure were controlled by using a pressure controller valve and  
7 a mass flow controller (Figure S1). Outlet effluent from the column was continuously monitored  
8 using gas chromatography (GC-2014, SHIMADZU) with a thermal conductivity detector (TCD,  
9 detection limit 0.1 ppm). The column packed with sample was firstly purged with He flow (100  
10  $\text{mL min}^{-1}$ ) for 6 h at room temperature 298 K. The mixed gas flow rate during breakthrough  
11 process is  $2 \text{ mL min}^{-1}$  using 50/50 (v/v)  $\text{C}_2\text{H}_2/\text{CO}_2$ . After the breakthrough experiment, the sample  
12 was regenerated under vacuum.

13 The actual  $\text{C}_2\text{H}_2$  capture amount and separation factor of  $\text{C}_2\text{H}_2/\text{CO}_2$  were calculated by reported  
14 method.<sup>[S2]</sup> The actual adsorbed amount of gas  $i$  ( $q_i$ ) is calculated from the breakthrough curve by  
15 the equation:

$$16 \quad q_i = \frac{F_i \times t_0 - V_{dead} - \int_0^{t_0} F_e \Delta t}{m} \quad (5)$$

17 where  $F_i$  is the influent flow rate of the specific gas ( $\text{ml min}^{-1}$ );  $t_0$  is the adsorption time (min);  
18  $V_{dead}$  is the dead volume of the system ( $\text{cm}^3$ );  $F_e$  is the effluent flow rate of the specific gas ( $\text{ml}$   
19  $\text{min}^{-1}$ ); and  $m$  is the mass of the sorbent (g). The separation factor ( $\alpha$ ) of the breakthrough  
20 experiment is determined as

$$21 \quad \alpha = \frac{q_1}{q_2} \times \frac{y_2}{y_1} \quad (6)$$

22 where  $y_i$  is the molar fraction of gas  $i$  in the gas mixture.

23 In this case, the adsorbed amounts of  $\text{C}_2\text{H}_2$  are calculated to be  $4.10 \text{ mol L}^{-1}$ . Accordingly, the  
24 separation factor is  $\alpha = 1.7$ .

25  
26  
27  
28

1 **Table S1.** Crystallographic Data of **FeNi-M'MOF**, **FeNi-M'MOF $\supset$ C<sub>2</sub>D<sub>2</sub>** and **FeNi-**  
2 **M'MOF $\supset$ CO<sub>2</sub>**.

| Compound name            | <b>FeNi-M'MOF</b>                                 | <b>FeNi-M'MOF<math>\supset</math>C<sub>2</sub>D<sub>2</sub></b>        | <b>FeNi-M'MOF<math>\supset</math>CO<sub>2</sub></b>                    |
|--------------------------|---------------------------------------------------|------------------------------------------------------------------------|------------------------------------------------------------------------|
| CCDC                     | 1958795                                           | 1958796                                                                | 1958797                                                                |
| Empirical formula        | C <sub>8</sub> H <sub>4</sub> N <sub>6</sub> FeNi | C <sub>9.39</sub> H <sub>4</sub> D <sub>1.39</sub> N <sub>6</sub> FeNi | C <sub>8.71</sub> H <sub>4</sub> N <sub>6</sub> O <sub>1.41</sub> FeNi |
| Formula weight           | 298.70                                            | 318.16                                                                 | 329.81                                                                 |
| Crystal system           | Tetragonal                                        | Tetragonal                                                             | Tetragonal                                                             |
| Space group              | P4/mmm                                            | P 4/mmm                                                                | P4/mmm                                                                 |
| <i>a</i> (Å)             | 7.1535(10)                                        | 7.1038(9)                                                              | 7.1590(10)                                                             |
| <i>b</i> (Å)             | 7.1535                                            | 7.1038                                                                 | 7.159                                                                  |
| <i>c</i> (Å)             | 7.0515(16)                                        | 6.9381(16)                                                             | 7.0440(14)                                                             |
| $\alpha$ (°)             | 90                                                | 90.0                                                                   | 90.0                                                                   |
| $\beta$ (°)              | 90                                                | 90.0                                                                   | 90.0                                                                   |
| $\gamma$ (°)             | 90                                                | 90.0                                                                   | 90.0                                                                   |
| Volume (Å <sup>3</sup> ) | 360.843                                           | 350.124                                                                | 361.014                                                                |
| <i>Z</i>                 | 1                                                 | 1                                                                      | 1                                                                      |
| $R_p^a I > 2\theta$      | 0.0195                                            | 0.0169                                                                 | 0.0179                                                                 |
| $R_{wp}^b I > 2\theta$   | 0.0242                                            | 0.0208                                                                 | 0.0220                                                                 |

3  $R_p^a = \frac{\sum [cY^{sim}(2\theta_i) - I^{exp}(2\theta_i) + Y^{back}(2\theta_i)]}{\sum [I^{exp}(2\theta_i)]}$ .

4  $R_{wp}^b = \{w_p [cY^{sim}(2\theta_i) - I^{exp}(2\theta_i) + Y^{back}(2\theta_i)] / \sum w_p [I^{exp}(2\theta_i)]\}^{1/2}$ , and  $w_p = 1/I^{exp}(2\theta_i)$ .

5

1 **Table S2.** Comparisons of the density of accessible metal sites between **FeNi-M'MOF** and other  
 2 MOFs.

| MOF                           | Formula                                                         | Formula Weight (g mol <sup>-1</sup> ) | Density (g cm <sup>-3</sup> ) | Volumetric density of accessible metal sites (mmol cm <sup>-3</sup> ) |
|-------------------------------|-----------------------------------------------------------------|---------------------------------------|-------------------------------|-----------------------------------------------------------------------|
| Zn-MOF-74                     | Zn <sub>2</sub> C <sub>8</sub> H <sub>2</sub> O <sub>6</sub>    | 324.88                                | 1.219                         | 7.5 <sup>[S3]</sup>                                                   |
| Co-MOF-74                     | Co <sub>2</sub> C <sub>8</sub> H <sub>2</sub> O <sub>6</sub>    | 311.96                                | 1.181                         | 7.6 <sup>[S4]</sup>                                                   |
| Ni-MOF-74                     | Ni <sub>2</sub> C <sub>8</sub> H <sub>2</sub> O <sub>6</sub>    | 311.48                                | 1.194                         | 7.7 <sup>[S5]</sup>                                                   |
| PCP-31                        | Cu <sub>2</sub> C <sub>22</sub> H <sub>12</sub> O <sub>10</sub> | 563.40                                | 0.703                         | 2.5 <sup>[S6]</sup>                                                   |
| HKUST-1                       | Cu <sub>3</sub> C <sub>18</sub> H <sub>6</sub> O <sub>12</sub>  | 604.87                                | 0.879                         | 4.4 <sup>[S7]</sup>                                                   |
| Ni-( <i>m</i> -dobdc)         | Ni <sub>2</sub> C <sub>8</sub> H <sub>2</sub> O <sub>6</sub>    | 311.48                                | 1.200                         | 7.7 <sup>[S8]</sup>                                                   |
| UTSA-74a <sup>*</sup>         | Zn <sub>2</sub> C <sub>8</sub> H <sub>2</sub> O <sub>6</sub>    | 324.88                                | 1.342                         | 8.3 <sup>[S9]</sup>                                                   |
| <b>FeNi-M'MOF<sup>*</sup></b> | FeNiC <sub>8</sub> H <sub>4</sub> N <sub>6</sub>                | 298.70                                | 1.375                         | <b>9.2</b> (this work)                                                |

3 <sup>\*</sup>Noted that every open metal center in these MOFs have two accessible sites.

4

5 **Table S3.** Dual-site Langmuir fit parameters for C<sub>2</sub>H<sub>2</sub>, and CO<sub>2</sub> in **FeNi-M'MOF** at 298 K.

|                               | Site A                              |                              |                               | Site B                              |                              |                               |
|-------------------------------|-------------------------------------|------------------------------|-------------------------------|-------------------------------------|------------------------------|-------------------------------|
|                               | $q_{A,sat}$<br>mol kg <sup>-1</sup> | $b_{A0}$<br>Pa <sup>-1</sup> | $E_A$<br>kJ mol <sup>-1</sup> | $q_{B,sat}$<br>mol kg <sup>-1</sup> | $b_{B0}$<br>Pa <sup>-1</sup> | $E_B$<br>kJ mol <sup>-1</sup> |
| C <sub>2</sub> H <sub>2</sub> | 1                                   | 4.18E-13                     | 40                            | 4.1                                 | 7.70E-9                      | 27                            |
| CO <sub>2</sub>               | 3.84                                | 9.46E-10                     | 25                            |                                     |                              |                               |

6 **Table S4.** Dual-site Langmuir fit parameters for C<sub>2</sub>H<sub>2</sub>, and CO<sub>2</sub> in **FePt-M'MOF** at 298 K.

|                               | Site A                              |                              |                               | Site B                              |                              |                               |
|-------------------------------|-------------------------------------|------------------------------|-------------------------------|-------------------------------------|------------------------------|-------------------------------|
|                               | $q_{A,sat}$<br>mol kg <sup>-1</sup> | $b_{A0}$<br>Pa <sup>-1</sup> | $E_A$<br>kJ mol <sup>-1</sup> | $q_{B,sat}$<br>mol kg <sup>-1</sup> | $b_{B0}$<br>Pa <sup>-1</sup> | $E_B$<br>kJ mol <sup>-1</sup> |
| C <sub>2</sub> H <sub>2</sub> | 2.3                                 | 1.01E-09                     | 31                            | 0.9                                 | 1.49E-11                     | 30                            |
| CO <sub>2</sub>               | 2.8                                 | 2.06E-10                     | 29                            |                                     |                              |                               |

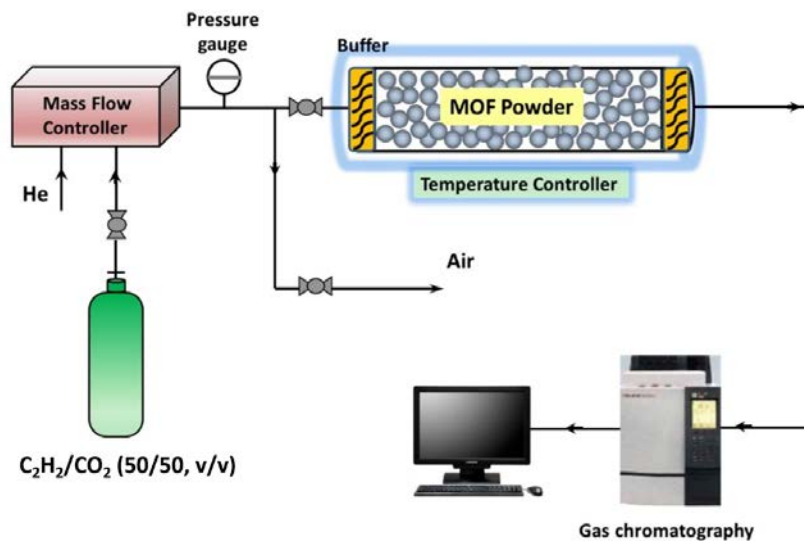

1

2 **Figure S1.** Illustration of the self-built breakthrough apparatus.

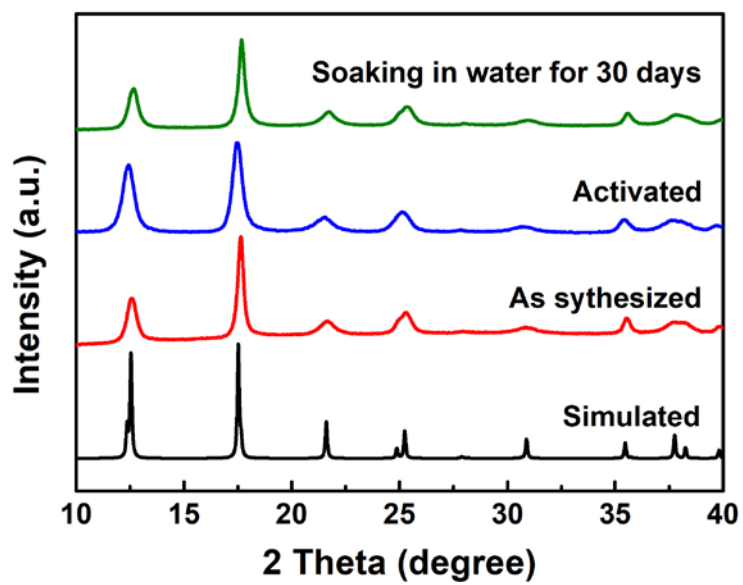

3

4 **Figure S2.** Powder X-ray diffraction patterns of FeNi-M'MOF at different conditions.

5



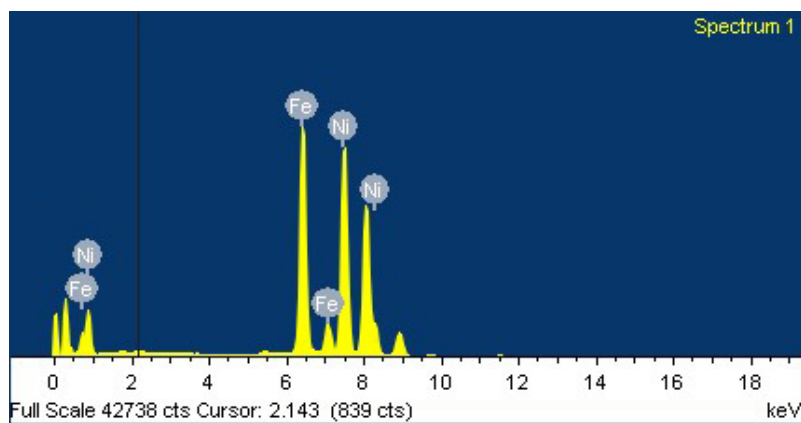

1  
2 **Figure S3.** EDS spectra of **FeNi-M'MOF**. The atomic molar ratio of Fe/Ni is 1.07, which is almost  
3 identical with the theoretical ratio of 1 in **FeNi-M'MOF**.

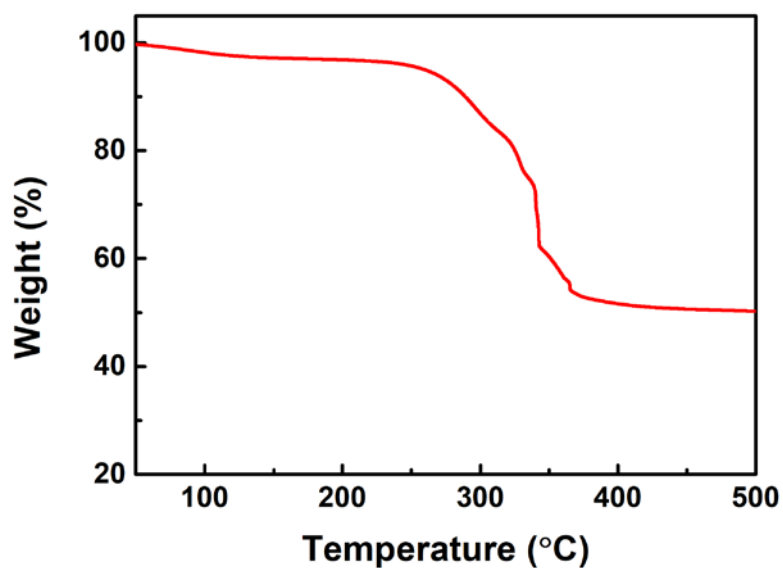

4  
5 **Figure S4.** TGA curve of **FeNi-M'MOF** under air atmosphere.

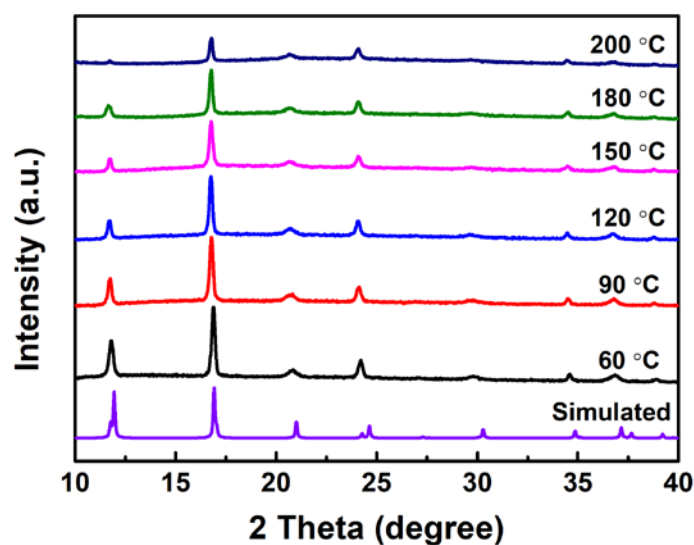

1  
2 **Figure S5.** Variable-temperature PXRD patterns of FeNi-M'MOF under air atmosphere.

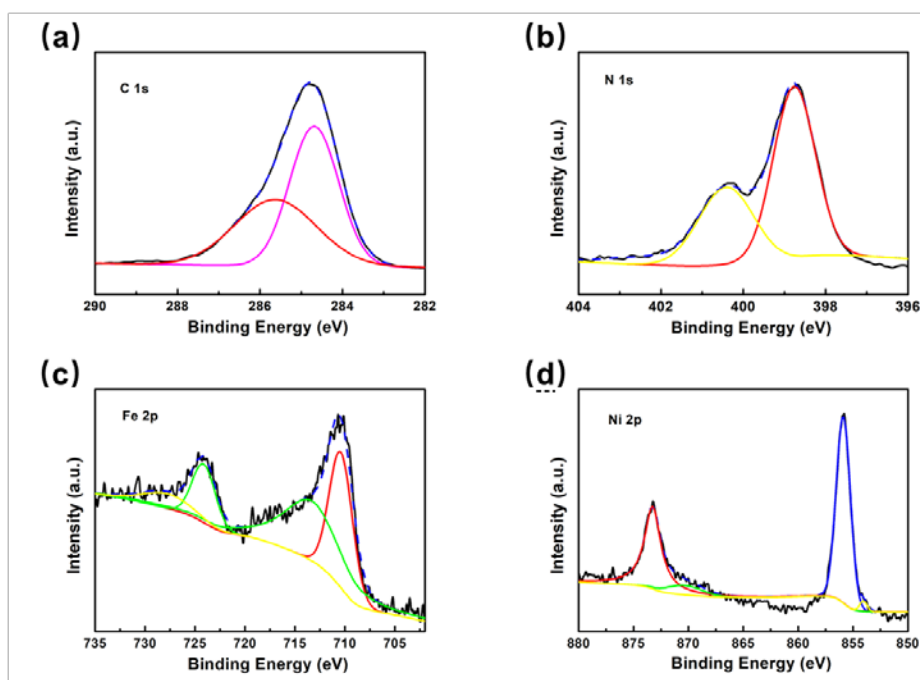

3  
4 **Figure S6.** XPS spectra of FeNi-M'MOF. C 1s spectra (a), N 1s spectra (b), Fe 2p spectra (c) and  
5 Ni 2p spectra (d) of FeNi-M'MOF. The binding energies of Fe 2p<sub>3/2</sub>, 2p<sub>1/2</sub> and satellite in FeNi-  
6 M'MOF are recorded at approximately 710.41 eV, 713.98 eV and 724.13 eV, which correspond  
7 to Fe<sup>2+</sup>.<sup>[S10]</sup> The binding energies of Ni 2p<sub>3/2</sub> and 2p<sub>1/2</sub> in FeNi-M'MOF are recorded at  
8 approximately 855.8 eV and 873.28 eV, which correspond to Ni<sup>2+</sup>.<sup>[S11]</sup> The molar ratio of Fe/Ni in  
9 FeNi-M'MOF is 1.03 based on XPS data, which is almost identical with the theoretical ratio of 1.

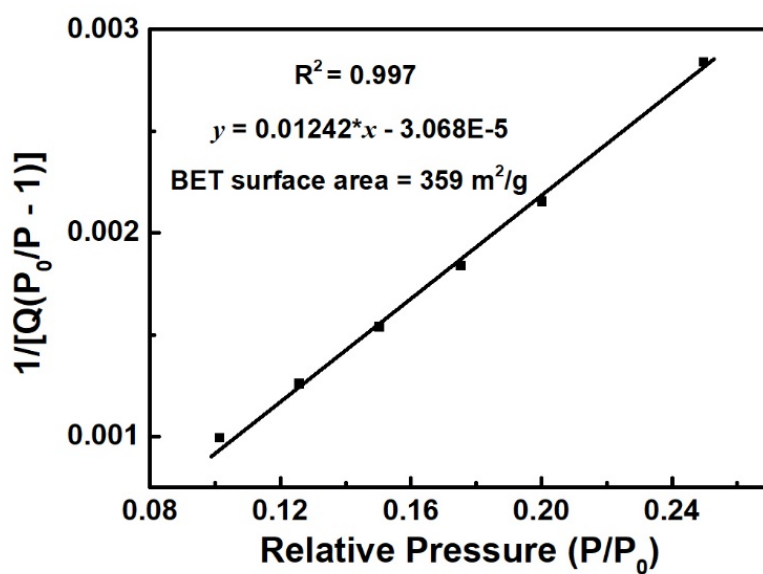

1  
 2 **Figure S7.** Calculation of BET surface area for FeNi-M'MOF based on N<sub>2</sub> adsorption isotherm  
 3 at 77 K.

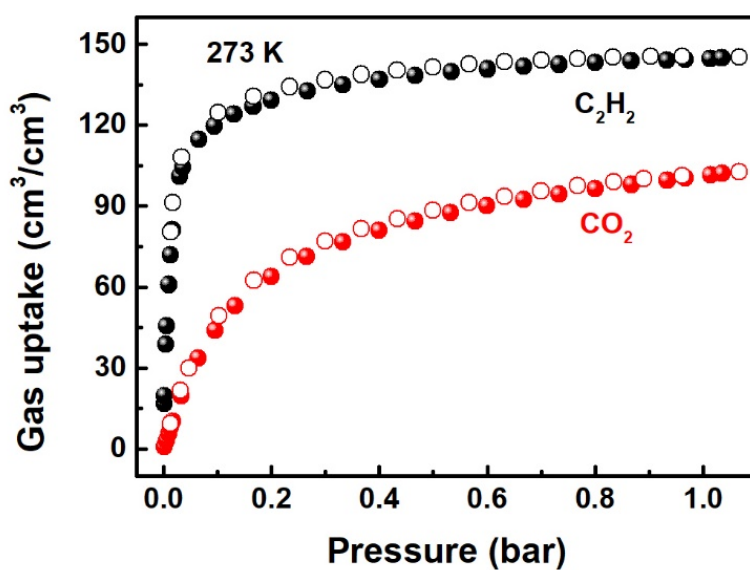

4  
 5 **Figure S8.** Single-component adsorption (solid) and desorption (open) isotherms of C<sub>2</sub>H<sub>2</sub> and CO<sub>2</sub>  
 6 in FeNi-M'MOF at 273 K.

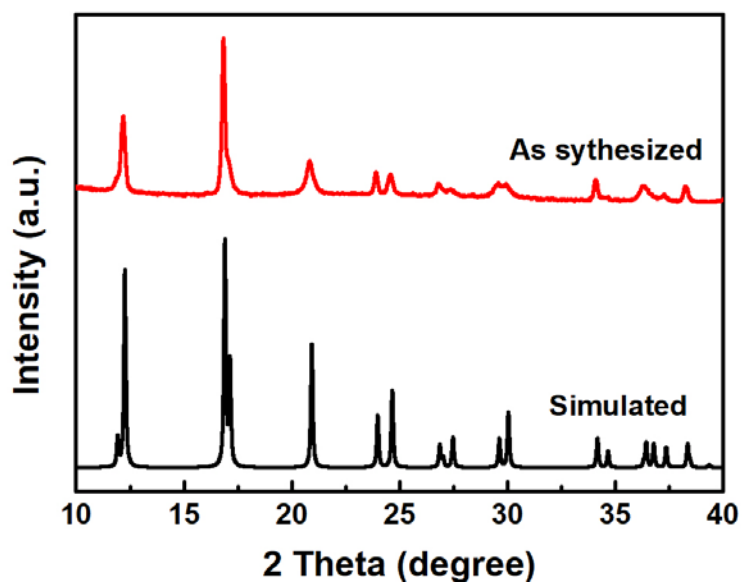

1

2 **Figure S9.** PXRD of simulated **FePt-M'MOF** and as synthesized **FePt-M'MOF**.

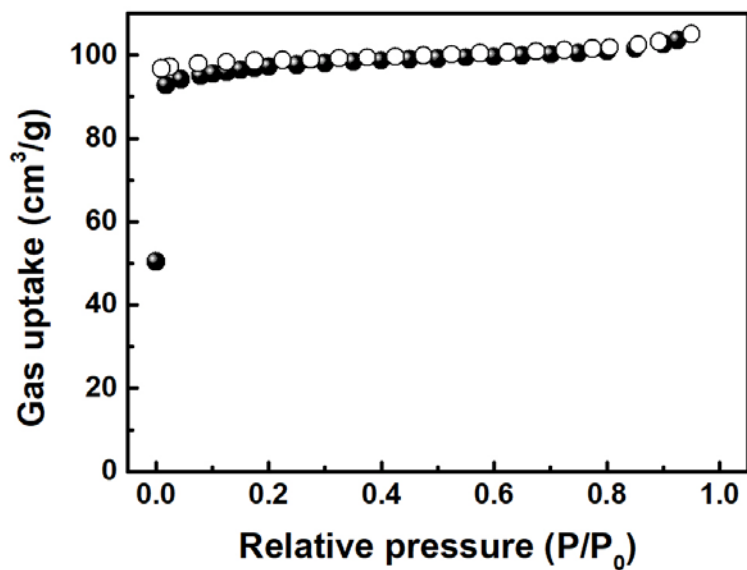

3

4 **Figure S10.** N<sub>2</sub> sorption isotherms for **FePt-M'MOF** at 77 K.

5

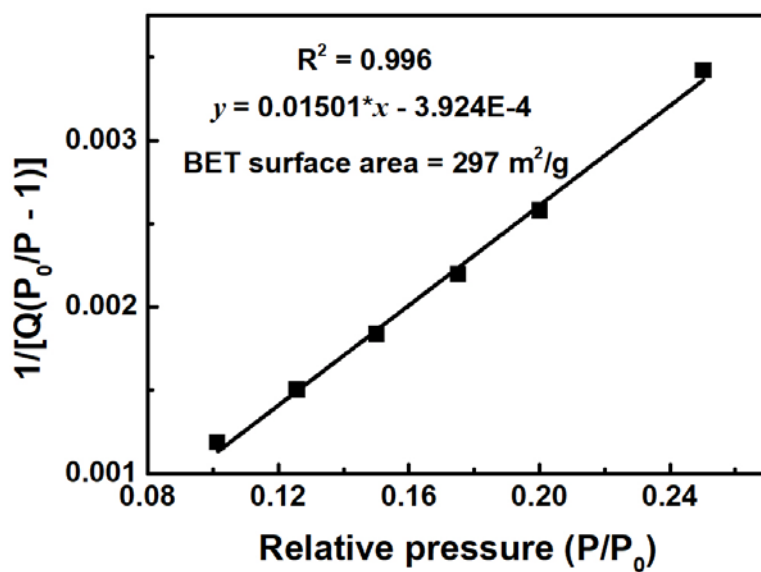

1  
 2 **Figure S11.** Calculation of BET surface area for **FePt-M'MOF** based on N<sub>2</sub> adsorption isotherm  
 3 at 77 K.

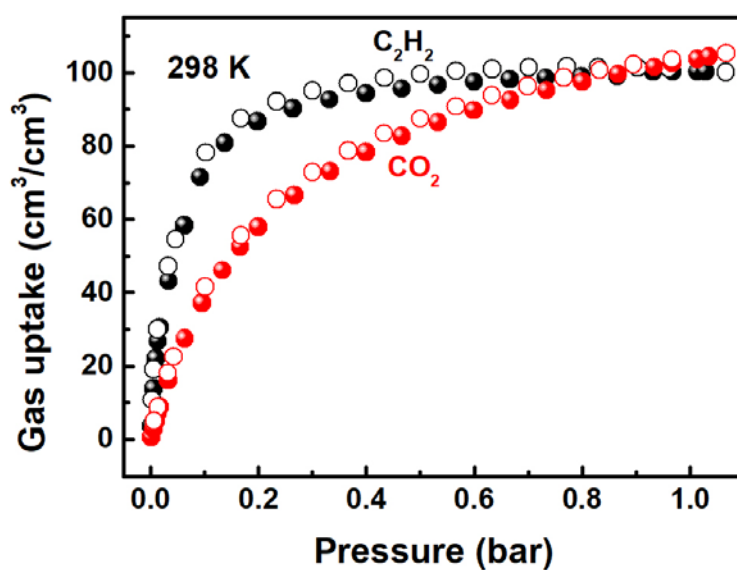

4  
 5 **Figure S12.** Single-component adsorption (solid) and desorption (open) isotherms of C<sub>2</sub>H<sub>2</sub> and  
 6 CO<sub>2</sub> in **FePt-M'MOF** at 298 K.

7

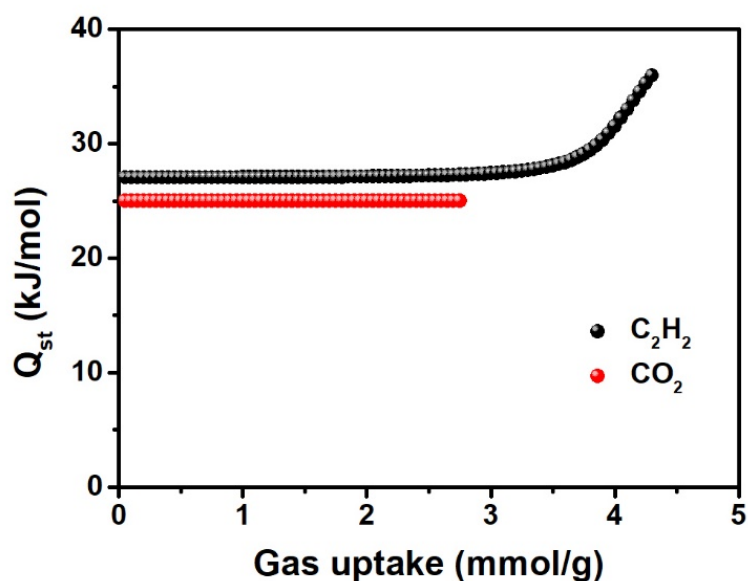

1

2 **Figure S13.** Heats of adsorption of both C<sub>2</sub>H<sub>2</sub> and CO<sub>2</sub> in FeNi-M'MOF.

3

4

5

6

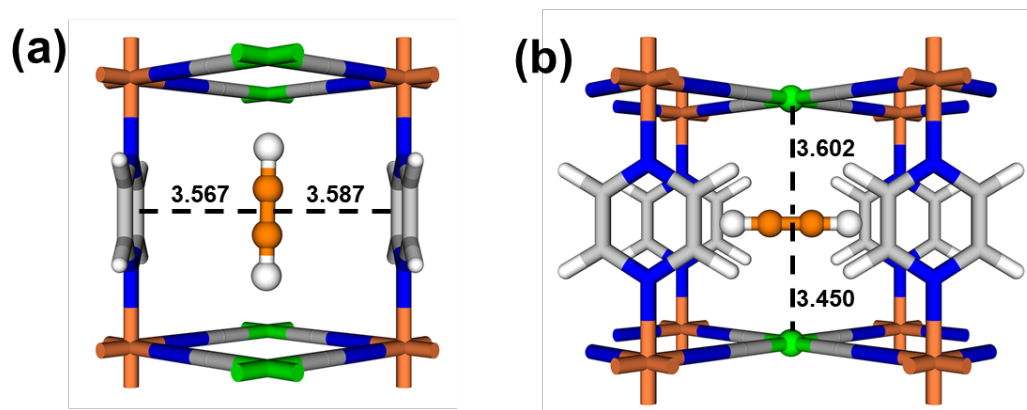

7

8 **Figure S14.** The DFT-D calculations binding sites of C<sub>2</sub>H<sub>2</sub> in FeNi-M'MOF. Viewed from a/b

9 axis (a) of site I, viewed from a/b axis (b) of site II of C<sub>2</sub>H<sub>2</sub>. The calculated C<sub>2</sub>H<sub>2</sub> static binding

10 energies are 41.4 kJ mol<sup>-1</sup> on site I and 29.9 kJ mol<sup>-1</sup> on site II. Fe, Ni, C, N, H in FeNi-M'MOF

11 are represented by orange, green, gray, blue and white, respectively; C and H in C<sub>2</sub>H<sub>2</sub> are

12 represented by orange and white, respectively. The unit of the distance is Å.

13

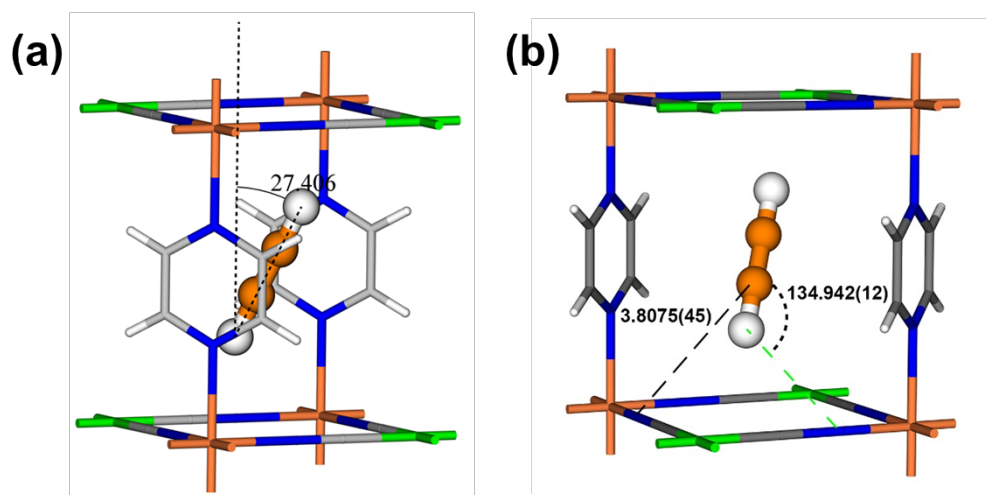

1  
 2 **Figure S15.** The  $C^{\delta-}\cdots N^{\delta+}$  distances and bond angle of the  $C-D^{\delta+}\cdots N^{\delta-}$  between  $C_2D_2$  and **FeNi-**  
 3 **M'MOF**. Fe, Ni, C, N, H in **FeNi-M'MOF** are represented by orange, green, gray, blue and white,  
 4 respectively; C and D in  $C_2D_2$  are represented by orange and white, respectively. The unit of the  
 5 distance is Å.

6

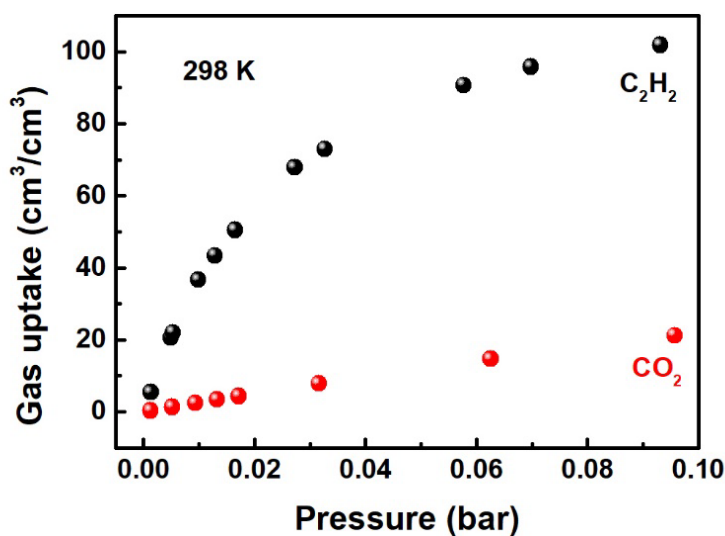

7  
 8 **Figure S16.**  $C_2H_2$  and  $CO_2$  single-component adsorption isotherms for **FeNi-M'MOF** at 298 K  
 9 under low pressure (0~0.1 bar).

10

## 11 References

- 12 [S1] a) R. Krishna, *RSC Adv.* **2017**, 7, 35724-35737; b) R. Krishna, *RSC Adv.* **2015**, 5, 52269-52295.  
 13 [S2] P. Li, Y. He, Y. Zhao, L. Weng, H. Wang, R. Krishna, H. Wu, W. Zhou, M. O'Keeffe, Y. Han, B. Chen,  
 14 *Angew. Chem. Int. Ed.* **2015**, 54, 574-577.

- 1 [S3] N. L. Rosi, J. Kim, M. Eddaoudi, B. Chen, M. O'Keeffe, O. M. Yaghi, *J. Am. Chem. Soc.* **2005**, *127*, 1504-  
2 1518.
- 3 [S4] P. D. C. Dietzel, Y. Morita, R. Blom, H. Fjellvåg, *Angew. Chem. Int. Ed.* **2005**, *44*, 6354-6358.
- 4 [S5] P. D. C. Dietzel, B. Panella, M. Hirscher, R. Blom, H. Fjellvåg, *Chem. Commun.* **2006**, 959-961.
- 5 [S6] J. Duan, M. Higuchi, J. Zheng, S.-i. Noro, I. Y. Chang, K. Hyeon-Deuk, S. Mathew, S. Kusaka, E. Sivaniah,  
6 R. Matsuda, S. Sakaki, S. Kitagawa, *J. Am. Chem. Soc.* **2017**, *139*, 11576-11583.
- 7 [S7] S. S. Y. Chui, S. M. F. Lo, J. P. H. Charmant, A. G. Orpen, I. D. Williams, *Science* **1999**, *283*, 1148-1150.
- 8 [S8] M. T. Kapelewski, S. J. Geier, M. R. Hudson, D. Stück, J. A. Mason, J. N. Nelson, D. J. Xiao, Z. Hulvey,  
9 E. Gilmour, S. A. FitzGerald, M. Head-Gordon, C. M. Brown, J. R. Long, *J. Am. Chem. Soc.* **2014**, *136*,  
10 12119-12129.
- 11 [S9] F. Luo, C. Yan, L. Dang, R. Krishna, W. Zhou, H. Wu, X. Dong, Y. Han, T.-L. Hu, M. O'Keeffe, L. Wang,  
12 M. Luo, R.-B. Lin, B. Chen, *J. Am. Chem. Soc.* **2016**, *138*, 5678-5684.
- 13 [S10] T. Yamashita, P. Hayes, *Appl. Surf. Sci.* **2008**, *254*, 2441-2449.
- 14 [S11] D. Yan, C. Yu, D. Li, X. Zhang, J. Li, T. Lu, L. Pan, *J. Mater. Chem. A* **2016**, *4*, 11077-11085.
- 15
